# Supplementary material for: In Vitro and In Vivo Efficacy of a Stroma-Targeted, Tumor Microenvironment Responsive Oncolytic Adenovirus in Different Preclinical Models of Cancer
Source: MDPI journal article supplement (doi:10.3390/ijms24129992), 2023-06-10
Supplement: s1 [file s1]

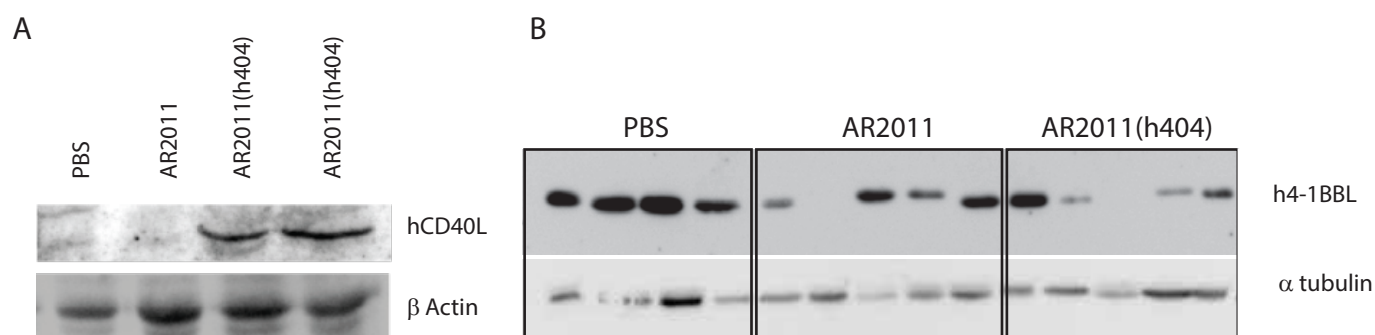

**Figure S2. Western Blot of tumor samples obtained from in vivo studies in nude mice.** Mice, 6-8 week old, were injected with  $4.5 \times 10^6$  SKOV-3 cells in the flank. When tumors reached  $100 \text{ mm}^3$  in average, mice were administered i.t. with  $5 \times 10^{10}$  v.p. of PBS, AR2011 or AR2011(h404) once. Seventy-two hours later mice were sacrificed, the tumor area was removed and a protein extract was prepared for western blot analyses. The membranes were probed with anti-CD40L (A) and anti-h4-1BBL (B). Anti-β-actin and anti-α-Tubulin were used as a loading control.
