# Supplementary material for: In Vitro and In Vivo Efficacy of a Stroma-Targeted, Tumor Microenvironment Responsive Oncolytic Adenovirus in Different Preclinical Models of Cancer
Source: MDPI journal article supplement (doi:10.3390/ijms24129992), 2023-06-10
Supplement: s1 [file s1]

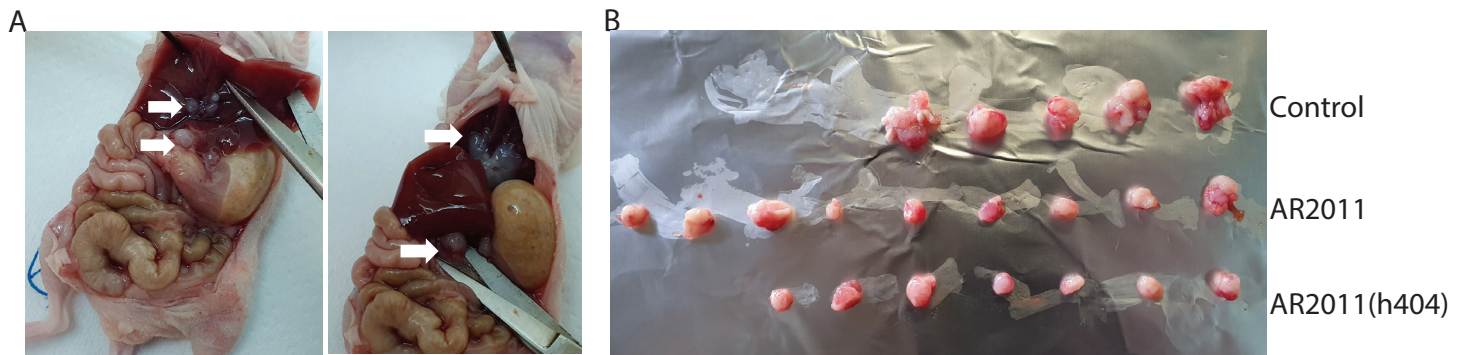

**Figure S3. Photographs from in vivo studies in nude mice harboring intraperitoneal tumors.** (A) Photographs were taken at autopsy on PBS-treated mice. The arrows show the location of metastatic nodules in the peritoneal cavity. (B) All the visible tumors were removed, collected for each single mouse and photographed.
