# Supplementary material for: In Vitro and In Vivo Efficacy of a Stroma-Targeted, Tumor Microenvironment Responsive Oncolytic Adenovirus in Different Preclinical Models of Cancer
Source: Int J Mol Sci. 2023 Jun 10;24(12):9992. doi: 10.3390/ijms24129992 (PMC10297998; doi:10.3390/ijms24129992)
Supplement: Supplementary file 1 [file ijms-24-09992-s001.zip]

Archive with 4 entries (4 files):
- Figure S1 25 de mayo  2023.pdf
- Figure S2 25 de mayo 2023.pdf
- Figure S3 25 de mayo 2023.pdf
- Figure S4 junio 2023.pdf
